# Supplementary material for: The Association between Nonalcoholic Fatty Liver Disease and Stroke: Results from the Korean Genome and Epidemiology Study (KoGES)
Source: PubMed Central journal article supplement (PMC7765788; doi:10.3390/ijerph17249568), 2020-12-21
Supplement: ijerph-17-09568-s001.pdf [file ijerph-17-09568-s001.pdf]

**Supplementary Table1: Hazard ratio (95% confidence interval) for the incident of stroke according to the AST, ALT, and GGT groups.**

|                                    | AST (%) |                     |                     |                     |
|------------------------------------|---------|---------------------|---------------------|---------------------|
|                                    | <25     | 25-50               | 50-75               | >75                 |
| <b>Incident stroke case (n, %)</b> |         |                     |                     |                     |
| <b>Crude Hazard ratio</b>          | 1.00    | 1.01<br>(0.66-1.56) | 1.03<br>(0.67-1.58) | 1.23<br>(0.80-1.88) |
| <b>Model 1</b>                     | 1.00    | 0.93<br>(0.60-1.43) | 0.88<br>(0.57-1.36) | 1.05<br>(0.68-1.61) |
| <b>Model 2</b>                     | 1.00    | 0.94<br>(0.61-1.44) | 0.89<br>(0.58-1.37) | 1.00<br>(0.65-1.53) |
| <b>Model 3</b>                     | 1.00    | 0.94<br>(0.61-1.44) | 0.91<br>(0.59-1.40) | 1.02<br>(0.66-1.58) |

  

|                                    | ALT (%) |                     |                     |                     |
|------------------------------------|---------|---------------------|---------------------|---------------------|
|                                    | <25     | 25-50               | 50-75               | >75                 |
| <b>Incident stroke case (n, %)</b> |         |                     |                     |                     |
| <b>Crude Hazard ratio</b>          | 1.00    | 0.94<br>(0.60-1.46) | 0.95<br>(0.62-1.45) | 1.24<br>(0.83-1.85) |
| <b>Model 1</b>                     | 1.00    | 0.87<br>(0.56-1.36) | 0.87<br>(0.57-1.32) | 1.19<br>(0.79-1.77) |
| <b>Model 2</b>                     | 1.00    | 0.85<br>(0.54-1.32) | 0.84<br>(0.55-1.28) | 1.03<br>(0.69-1.56) |
| <b>Model 3</b>                     | 1.00    | 0.89<br>(0.57-1.39) | 0.89<br>(0.58-1.37) | 1.09<br>(0.72-1.67) |

  

|                                    | GGT (%) |                     |                     |                     |
|------------------------------------|---------|---------------------|---------------------|---------------------|
|                                    | <25     | 25-50               | 50-75               | >75                 |
| <b>Incident stroke case (n, %)</b> |         |                     |                     |                     |
| <b>Crude Hazard ratio</b>          | 1.00    | 0.99<br>(0.64-1.53) | 1.12<br>(0.73-1.70) | 1.32<br>(0.88-1.97) |
| <b>Model 1</b>                     | 1.00    | 0.93<br>(0.60-1.44) | 1.05<br>(0.69-1.61) | 1.20<br>(0.80-1.48) |
| <b>Model 2</b>                     | 1.00    | 0.85<br>(0.55-1.33) | 0.88<br>(0.57-1.36) | 0.95<br>(0.63-1.45) |
| <b>Model 3</b>                     | 1.00    | 0.86<br>(0.55-1.34) | 0.91<br>(0.58-1.43) | 1.00<br>(0.64-1.55) |

Alanine aminotransferase (AST), Alanine aminotransferase (ALT),  $\gamma$ -glutamyl transpeptidase (GGT)

Model 1: sex, age.

Model 2: model 1 + hypertension, diabetes mellitus, hyperlipidemia, cardiovascular disease, smoking and alcohol status, and body mass index.

Model 3: model 2 + metabolic equivalent of task, cancer, hyperlipidemia drug, and antihypertension drug.

Estimated from Cox's proportional hazard regression model.

AST: Alanine aminotransferase, ALT: Alanine aminotransferase, GGT:  $\gamma$ -glutamyl transpeptidase
